# Supplementary material for: Gamma Radiation Induces an Interferon-Independent Antiviral Activity in Human Macrophages
Source: Research Square preprint supplement (doi:10.21203/rs.3.rs-8370464/v1), 2026-02-07
Supplement: Supplementary file 1 [file 9a588f383fc4f4ae15a9bcb7.pdf]

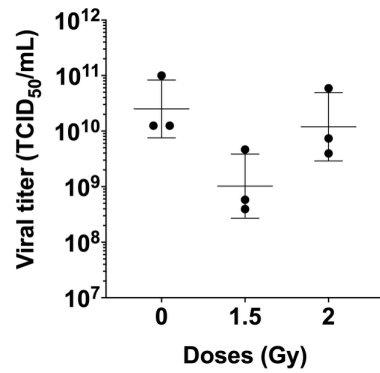

**Figure S1. Viral titers in supernatants of hMCs irradiated with gamma rays at doses of 0, 1.5, and 2 Gy.**

Twenty-four hours after irradiation, cells were infected with Influenza A virus (MOI = 1). Supernatants were collected at 12 h.p.i., and viral titers were determined by TCID<sub>50</sub> assay. The center line represents the mean viral titer, and error bars indicate the standard deviation from three independent experiments.
